# Supplementary material for: Imidazolium sulfonate-containing pentablock copolymer–ionic liquid membranes for electroactive actuators
Source: Royal Society of Chemistry journal article supplement (doi:10.1039/c2jm16117f), 2012-01-01
Supplement: c2jm16117f.pdf [file c2jm16117f.pdf]

## \*Supporting Information

### Imidazolium Sulfonate-Containing Pentablock Copolymer/Ionic Liquid Composite Membranes for Electroactive Actuators

Renlong Gao,<sup>1</sup> Dong Wang,<sup>2</sup> James R. Heflin,<sup>2</sup> and Timothy E. Long<sup>1\*</sup>

<sup>1</sup>Department of Chemistry, Macromolecules and Interfaces Institute, and <sup>2</sup>Department of Physics, Virginia Tech, Blacksburg 24061 (USA)

\*Corresponding author: E-mail: [telong@vt.edu](mailto:telong@vt.edu) (T.E. Long) Tel: +1(540)231-2480.

Fax: +1(540)231-8517

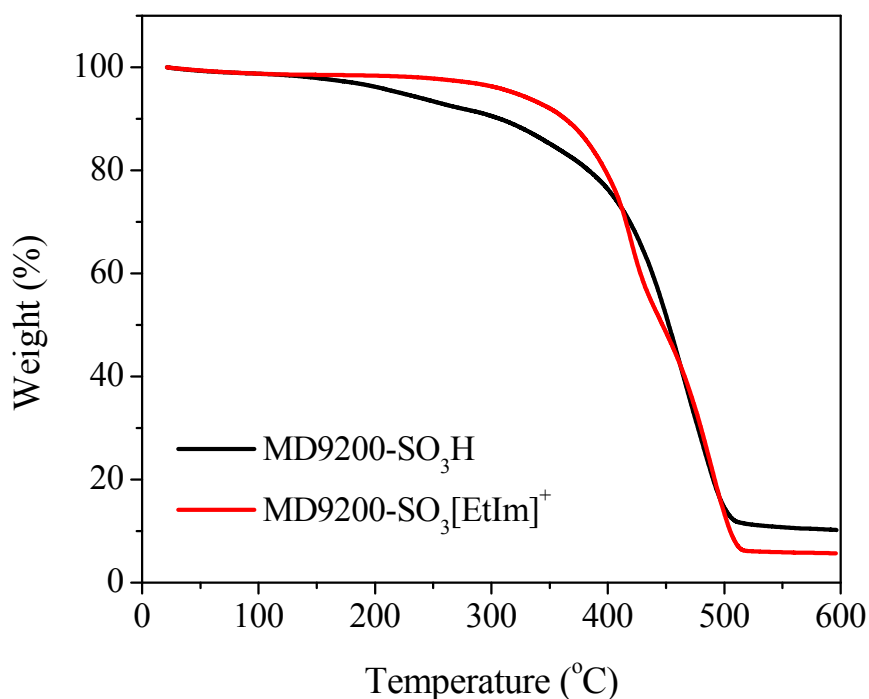

**Figure S-1:** TGA demonstrated enhanced thermal stability of MD9200-SO<sub>3</sub>[EtIm]<sup>+</sup> (red), as compared to the non-neutralized polymer MD9200-SO<sub>3</sub>H (black)

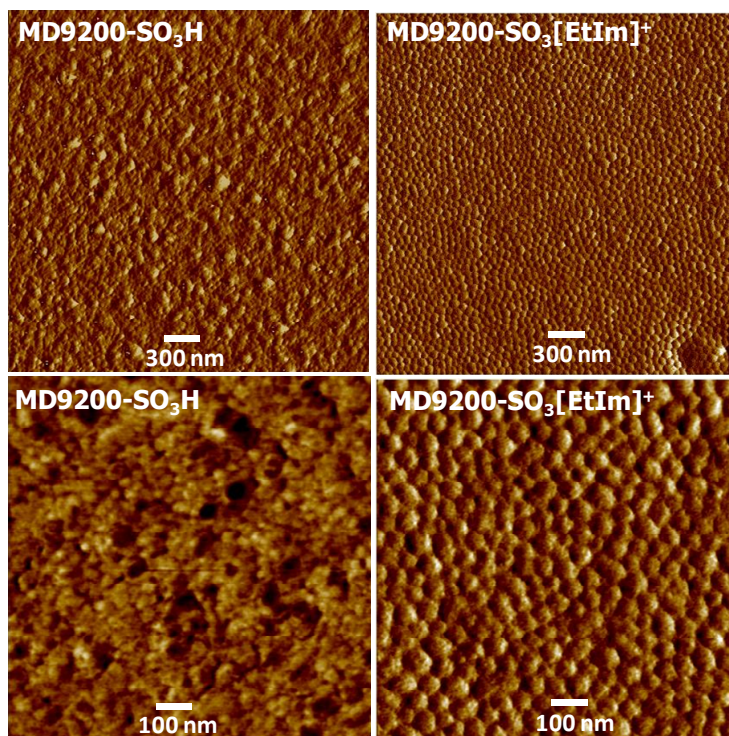

**Figure S-2:** AFM phase images indicated that MD9200-SO<sub>3</sub>[EtIm]<sup>+</sup> exhibited more well-defined morphological features than non-neutralized sample MD9200-SO<sub>3</sub>H.
